# Supplementary material
Source: publisher figshare collection journal article supplement (https://asha.figshare.com/ndownloader/files/14574677)
Supplement: Supplementary file 1 [file 14574677]

## Sheet: Normal Distribution
Online supplemental material, McMillan & Cannon, "Bayesian Applications in Auditory Research," AJA, https://doi.org/10.1044/2018_JSLHR-H-ASTM-18-0228
Supplemental Material S2.
Potential Scenario: Estimate the effect of sound therapy for reducing the perceived loudness of tinnitus.
Parameter: Denote θ as the expected change in tinnitus loudness (in dB SPL) after one month of using a bedside noise machine.
Distribution: Gaussian (Normal).
						Parameter	Prior	Likelihood	Posterior	Does the graph display the expected distribution?
Prior						θ	P(θ)	L(Y|θ)	P(θ|Y)
µ	x	σ^2	variance			-25	0.00268784	1.03715e-20	2.91033e-21
-5	0.17	25	147.059			-24	0.00269026	4.11191e-19	1.29641e-19
Likelihood						-23	0.00269256	1.38919e-17	4.89409e-18
Sample mean	sample n					-22	0.00269474	3.99935e-16	1.56579e-16
-1.5	10					-21	0.0026968	9.81142e-15	4.24544e-15
Posterior						-20	0.00269873	2.0511e-13	9.75536e-14
Mean	Lower 5%	Lower 95%				-19	0.00270054	3.65389e-12	1.89974e-12
-1.55851	-5.6019	2.48489				-18	0.00270223	5.54672e-11	3.13527e-11
						-17	0.00270379	7.17514e-10	4.38517e-10
Steps:						-16	0.00270523	7.90928e-09	5.19791e-09
Define parameters µ, x, σ^2						-15	0.00270654	7.42945e-08	5.22156e-08
Verify graph of prior						-14	0.00270773	5.94688e-07	4.44532e-07
Input new data (sample mean and number of observations)						-13	0.0027088	4.05634e-06	3.20727e-06
						-12	0.00270974	2.35772e-05	1.96109e-05
						-11	0.00271055	0.000116779	0.000101623
						-10	0.00271124	0.000492888	0.000446286
						-9	0.0027118	0.00177274	0.00166099
						-8	0.00271224	0.00543319	0.00523902
						-7	0.00271256	0.0141898	0.0140044
						-6	0.00271274	0.0315801	0.0317255
						-5	0.00271281	0.059891	0.0609091
						-4	0.00271274	0.0967883	0.099103
						-3	0.00271256	0.13329	0.136654
						-2	0.00271224	0.156417	0.159693
						-1	0.0027118	0.156417	0.158155
						0	0.00271124	0.13329	0.132742
						1	0.00271055	0.0967883	0.0944198
						2	0.00270974	0.059891	0.0569179
						3	0.0027088	0.0315801	0.029078
						4	0.00270773	0.0141898	0.0125896
						5	0.00270654	0.00543319	0.00461943
						6	0.00270523	0.00177274	0.00143647
						7	0.00270379	0.000492888	0.000378558
						8	0.00270223	0.000116779	8.45473e-05
						9	0.00270054	2.35772e-05	1.60029e-05
						10	0.00269873	4.05634e-06	2.567e-06
						11	0.0026968	5.94688e-07	3.48966e-07
						12	0.00269474	7.42945e-08	4.02042e-08
						13	0.00269256	7.90928e-09	3.92546e-09
						14	0.00269026	7.17514e-10	3.24817e-10
						15	0.00268784	5.54672e-11	2.27781e-11
						16	0.00268529	3.65389e-12	1.35372e-12
						17	0.00268262	2.0511e-13	6.81816e-14
						18	0.00267983	9.81142e-15	2.91029e-15
						19	0.00267692	3.99935e-16	1.05278e-16
						20	0.00267389	1.38919e-17	3.22751e-18
						21	0.00267074	4.11191e-19	8.38547e-20
						22	0.00266747	1.03715e-20	1.84637e-21
						23	0.00266408	2.2292e-22	3.4454e-23
						24	0.00266057	4.08292e-24	5.44867e-25
						25	0.00265694	6.37244e-26	7.3025e-27

## Sheet: Beta Distribution
Potential Scenario: Estimate the prevalence of Superior canal dehiscence syndrome (SCDS) among children.
Parameter: Denote θ as the prevalence of SCDS among children (< 18yrs).
Distribution: Beta.
					Parameter	Prior	Likelihood	Posterior	Does the graph display the expected distribution?
Prior					θ	P(θ)	L(Y|θ)	P(θ|Y)
α	β				0.01	0.399416	0.0913517	0.177224
2	6				0.02	0.759293	0.16675	0.614972
Likelihood					0.03	1.082	0.228069	1.19861
sucesses	trials				0.04	1.36983	0.277014	1.84309
1	10				0.05	1.62494	0.315125	2.48714
Posterior					0.06	1.84944	0.343797	3.08832
3	15				0.07	2.04532	0.364288	3.61899
					0.08	2.21451	0.377729	4.06293
Steps:					0.09	2.35884	0.385137	4.4126
Define parameters α, β					0.1	2.48006	0.38742	4.66687
Verify graph of prior					0.11	2.57984	0.385392	4.8292
Input new data (number of successes and trials)					0.12	2.65977	0.379774	4.90625
					0.13	2.72138	0.371207	4.90667
					0.14	2.76611	0.360258	4.84021
					0.15	2.79534	0.347425	4.71713
					0.16	2.81038	0.333145	4.54758
					0.17	2.81248	0.317798	4.34132
					0.18	2.80279	0.301715	4.10742
					0.19	2.78245	0.28518	3.85414
					0.2	2.75251	0.268435	3.58881
					0.21	2.71396	0.251688	3.31778
					0.22	2.66775	0.235112	3.04649
					0.23	2.61475	0.218849	2.77943
					0.24	2.55581	0.203018	2.52025
					0.25	2.4917	0.187712	2.27179
					0.26	2.42316	0.173005	2.0362
					0.27	2.35086	0.158953	1.815
					0.28	2.27546	0.145596	1.60917
					0.29	2.19755	0.132961	1.4192
					0.3	2.11768	0.121061	1.24522
					0.31	2.03637	0.109901	1.08703
					0.32	1.95409	0.0994787	0.94418
					0.33	1.87127	0.0897816	0.816028
					0.34	1.78833	0.0807931	0.701783
					0.35	1.70563	0.0724917	0.600556
					0.36	1.6235	0.0648518	0.511393
					0.37	1.54225	0.0578451	0.433313
					0.38	1.46215	0.0514409	0.365326
					0.39	1.38345	0.0456072	0.306462
					0.4	1.30637	0.0403108	0.255781
					0.41	1.2311	0.0355183	0.212386
					0.42	1.15781	0.0311962	0.175437
					0.43	1.08666	0.0273113	0.14415
					0.44	1.01775	0.0238311	0.117806
					0.45	0.951207	0.0207241	0.0957487
					0.46	0.887107	0.0179598	0.0773853
					0.47	0.825518	0.0155089	0.0621853
					0.48	0.766491	0.0133435	0.0496775
					0.49	0.710062	0.0114374	0.0394462
					0.5	0.65625	0.00976563	0.0311279
					0.51	0.605062	0.00830491	0.0244071
					0.52	0.556492	0.00703355	0.0190114
					0.53	0.510522	0.00593139	0.0147079
					0.54	0.467124	0.00497983	0.0112987
					0.55	0.42626	0.00416174	0.0086165
					0.56	0.387883	0.00346148	0.00652144
					0.57	0.351938	0.00286478	0.00489709
					0.58	0.318364	0.00235869	0.00364734
					0.59	0.287092	0.00193155	0.00269345
					0.6	0.258048	0.00157286	0.00197139
					0.61	0.231154	0.00127324	0.00142953
					0.62	0.206328	0.00102434	0.00102656
					0.63	0.183484	0.000818759	0.000729685
					0.64	0.162533	0.000649984	0.000513127
					0.65	0.143385	0.000512302	0.000356787
					0.66	0.125947	0.000400732	0.000245145
					0.67	0.110127	0.000310957	0.000166332
					0.68	0.0958315	0.000239254	0.000111365
					0.69	0.0829673	0.000182433	7.35177e-05
					0.7	0.071442	0.000137781	4.78106e-05
					0.71	0.0611642	0.000103001	3.05998e-05
					0.72	0.0520442	7.61649e-05	1.92534e-05
					0.73	0.0439937	5.56669e-05	1.18951e-05
					0.74	0.0369273	4.01783e-05	7.20644e-06
					0.75	0.0307617	2.86102e-05	4.27477e-06
					0.76	0.0254167	2.00777e-05	2.47865e-06
					0.77	0.0208151	1.38689e-05	1.40217e-06
					0.78	0.0168833	9.4167e-06	7.72213e-07
					0.79	0.013551	6.27481e-06	4.13004e-07
					0.8	0.010752	4.096e-06	2.1391e-07
					0.81	0.00842369	2.61377e-06	1.06943e-07
					0.82	0.00650767	1.62655e-06	5.1413e-08
					0.83	0.00494962	9.84279e-07	2.36631e-08
					0.84	0.00369938	5.77244e-07	1.03721e-08
					0.85	0.00271097	3.26769e-07	4.30275e-09
					0.86	0.00194262	1.77685e-07	1.67656e-09
					0.87	0.0013567	9.22591e-08	6.07961e-10
					0.88	0.000919683	4.54061e-08	2.0283e-10
					0.89	0.000602009	2.09857e-08	6.13632e-11
					0.9	0.000378	9e-09	1.6524e-11
					0.91	0.000225685	3.52553e-09	3.86463e-12
					0.92	0.000126616	1.2348e-09	7.59391e-13
					0.93	6.56481e-05	3.75289e-10	1.19665e-13
					0.94	3.06996e-05	9.47303e-11	1.41255e-14
					0.95	1.24688e-05	1.85547e-11	1.12372e-15
					0.96	4.12877e-06	2.51658e-12	5.04676e-17
					0.97	9.89982e-07	1.90925e-13	9.1806e-19
					0.98	1.31712e-07	5.0176e-15	3.20998e-21
					0.99	4.158e-09	9.9e-18	1.9994e-25
